# Supplementary material
Source: publisher figshare collection journal article supplement (https://sage.figshare.com/ndownloader/files/13585877)
Supplement: Supplementary file 1 [file 13585877]

## Additional Methods

**Freedom in the World coding** (FIW, 2012; Puddington, 2016). To construct a score of civil liberties, the FIW projects accounts for four dimensions that represent this construct: Freedom of expression and belief, associational and organizational rights, rule of law, and individual rights, and considers them jointly for a single score representing civil liberties, more broadly (F. House, 2014). The freedom of expression and belief dimension evaluates freedom in media, religion, and academic and personal discussions. The associational and organizational rights dimension evaluates the extent there can be freedom of assembly, demonstration, and open public discussion, and freedom for organizations. The rule of law dimension evaluates countries on such issues as whether there is an independent judiciary, protection from persecution and wars, and unjust policing and justice policies. Finally, the individual freedom dimension evaluates the extent citizens have freedom in their residence, employment, or institution of higher education, the extent they have a right to own property and private businesses, and equality of economic opportunities (F. House, 2014).

**Health Satisfaction.** Self-rated health satisfaction was measured with the item; “all in all, how would you describe your state of health these days?”, paired with a five-point scale ranging from 1 (*very poor*) to 5 (*very good*). Self-reported health satisfaction is an often used subjective indicator of health (Bobak, Pikhart, Rose, Hertzman, & Marmot, 2000; Carlson, 1998, 2004; Mansyur, Amick, Harrist, & Franzini, 2008; Poortinga, 2006; Subramanian, Kawachi, & Kennedy, 2001), and has been validated in longitudinal research (Frankenberg & Jones, 2004; Jylhä, Volpato, & Guralnik, 2006) and shown to predict long-term outcomes such as mortality (DeSalvo, Bloser, Reynolds, He, & Muntner, 2006; Idler & Benyamini, 1997). Overall, across countries, the average rating of health satisfaction was 3.54 ( $SD = .97$ ).

## References

- Bobak, M., Pikhart, H., Rose, R., Hertzman, C., & Marmot, M. (2000). Socioeconomic factors, material inequalities, and perceived control in self-rated health: cross-sectional data from seven post-communist countries. *Social Science & Medicine*, 51(9), 1343–1350. [https://doi.org/10.1016/S0277-9536\(00\)00096-4](https://doi.org/10.1016/S0277-9536(00)00096-4)
- Carlson, P. (1998). Self-perceived health in East and West Europe: another European health divide. *Social Science & Medicine*, 46(10), 1355–1366. [https://doi.org/10.1016/S0277-9536\(97\)10093-4](https://doi.org/10.1016/S0277-9536(97)10093-4)
- Carlson, P. (2004). The European health divide: a matter of financial or social capital? *Social Science & Medicine*, 59(9), 1985–1992. <https://doi.org/10.1016/j.socscimed.2004.03.003>
- DeSalvo, K. B., Bloser, N., Reynolds, K., He, J., & Muntner, P. (2006). Mortality prediction with a single general self-rated health question: A meta-analysis. *Journal of General Internal Medicine*, 21(3), 267–275. <https://doi.org/10.1111/j.1525-1497.2005.00291.x>
- Frankenberg, E., & Jones, N. R. (2004). Self-Rated Health and Mortality: Does the Relationship Extend to a Low Income Setting? *Journal of Health and Social Behavior*, 45(4), 441–452. <https://doi.org/10.1177/002214650404500406>
- House, F. (2014). *Freedom in the world 2014: The annual survey of political rights and civil liberties*. Rowman & Littlefield.
- Idler, E. L., & Benyamini, Y. (1997). Self-Rated Health and Mortality: A Review of Twenty-Seven Community Studies. *Journal of Health and Social Behavior*, 38(1), 21. <https://doi.org/10.2307/2955359>
- Jylhä, M., Volpato, S., & Guralnik, J. M. (2006). Self-rated health showed a graded association with frequently used biomarkers in a large population sample. *Journal of Clinical Epidemiology*, 59(5), 465–471. <https://doi.org/10.1016/j.jclinepi.2005.12.004>

Mansyur, C., Amick, B. C., Harrist, R. B., & Franzini, L. (2008). Social capital, income inequality, and self-rated health in 45 countries. *Social Science & Medicine*, 66(1), 43–56. <https://doi.org/10.1016/j.socscimed.2007.08.015>

Poortinga, W. (2006). Social relations or social capital? Individual and community health effects of bonding social capital. *Social Science & Medicine*, 63(1), 255–270. <https://doi.org/10.1016/j.socscimed.2005.11.039>

Subramanian, S. ., Kawachi, I., & Kennedy, B. P. (2001). Does the state you live in make a difference? Multilevel analysis of self-rated health in the US. *Social Science & Medicine*, 53(1), 9–19. [https://doi.org/10.1016/S0277-9536\(00\)00309-9](https://doi.org/10.1016/S0277-9536(00)00309-9)
